# Supplementary material for: Cartilage Degeneration at Symptomatic Persistent Olecranon Physis in Adolescent Baseball Players
Source: Adv Orthop. 2014 Dec 18;2014:545438. doi: 10.1155/2014/545438 (PMC4281472; doi:10.1155/2014/545438)
Supplement: Supplementary file 1 — Supplementary Figure 1. a. Lateral radiograph of the right elbow showing persistent olecranon physis. b. Lateral radiograph of the left elbow showing an almost fused olecranon physis. c. Lateral radiograph of the right elbow immediately after the operation. The lesion was fixed with a tension-band wire with 2 pins and a figure-of-eight wire. d. Lateral radiograph of the right elbow 3 months postoperatively showing a fused olecranon physis. Supplementary Figure 2. a. Sagittal T1-weighted (a) and T2-weighted (b) magnetic resonance (MR) images of the right elbow showing equally intensity in the olecranon physis. Sagittal T2-weighted MR image with fat saturation (c) of the right elbow showing high intensity in the intramedullary region. [file 545438.f1.zip]

Archive with 5 entries (5 files):
- Supplementary figure 1a.wmf
- Supplementary figure 1b.wmf
- Supplementary figure 1c.wmf
- Supplementary figure 1d.wmf
- Supplementary Figure 2a-c.wmf
